# Supplementary material for: The Fight Just Born—Neonatal Cancer: Rare Occurrence with a Favorable Outcome but Challenging Management
Source: MDPI journal article supplement (doi:10.3390/cancers14092244), 2022-04-29
Supplement: s1 [file s1]

**Table S1.** Clinical characteristics of newborns with extracranial GCT are summarized. NA = not applicable.

| Sex | Age<br>(Days) | Diagnosis          | Localization        | Metastasis | Prenatal<br>Diagnosis | Chemotherapy | Surgery | Relapse | Outcome |
|-----|---------------|--------------------|---------------------|------------|-----------------------|--------------|---------|---------|---------|
| F   | 2             | Malignant Teratoma | sacroccocygeal      | no         | no                    | no           | yes     | no      | alive   |
| F   | 7             | Germinoma          | sacroccocygeal      | no         | no                    | no           | yes     | no      | alive   |
| F   | 0             | Germinoma          | sacroccocygeal      | no         | no                    | no           | yes     | no      | alive   |
| F   | 0             | Malignant Teratoma | sacroccocygeal      | no         | no                    | no           | yes     | no      | alive   |
| M   | 5             | Yolk sac tumor     | sacroccocygeal      | no         | no                    | no           | yes     | no      | alive   |
| F   | 5             | Yolk sac tumor     | sacroccocygeal      | no         | yes                   | no           | yes     | no      | alive   |
| M   | 0             | Yolk sac tumor     | heart               | no         | yes                   | no           | yes     | no      | alive   |
| F   | 3             | Mature teratoma    | sacroccocygeal      | no         | yes                   | no           | yes     | no      | alive   |
| M   | 16            | Germinoma          | sacroccocygeal      | no         | no                    | no           | yes     | no      | alive   |
| F   | 5             | Germinoma          | head/neck<br>region | no         | yes                   | no           | yes     | no      | alive   |
| F   | 21            | Yolk sac tumor     | sacroccocygeal      | no         | no                    | no           | yes     | no      | alive   |
| F   | 4             | Germinoma          | sacroccocygeal      | no         | no                    | no           | yes     | no      | alive   |
| F   | 1             | Germinoma          | sacroccocygeal      | no         | yes                   | no           | yes     | no      | alive   |
| F   | 3             | Germinoma          | sacroccocygeal      | no         | no                    | no           | yes     | no      | alive   |
| M   | 23            | Germinoma          | sacroccocygeal      | no         | no                    | no           | yes     | no      | alive   |

|   |    |                   |                     |    |     |    |     |              |       |
|---|----|-------------------|---------------------|----|-----|----|-----|--------------|-------|
| F | 21 | Yolk sac tumor    | head/neck<br>region | no | yes | no | yes | no           | alive |
| F | 20 | Germinoma         | sacroccocygeal      | no | yes | no | yes | no           | alive |
| F | 15 | Germinoma         | sacroccocygeal      | no | no  | no | yes | no           | alive |
| M | 15 | Germinoma         | sacroccocygeal      | no | no  | no | yes | yes          | alive |
| F | 19 | Germinoma         | sacroccocygeal      | no | no  | no | yes | no           | alive |
| F | 0  | Immature teratoma | sacroccocygeal      | no | no  | no | yes | no           | alive |
| F | 17 | Immature teratoma | sacroccocygeal      | no | no  | no | yes | no           | alive |
| F | 0  | Mature teratoma   | sacroccocygeal      | no | yes | no | yes | no           | alive |
| F | 16 | Immature teratoma | sacroccocygeal      | no | no  | no | yes | no           | alive |
| M | 0  | Yolk sac tumor    | sacroccocygeal      | no | yes | no | yes | no           | alive |
| F | 9  | Immature teratoma | sacroccocygeal      | no | no  | no | yes | no           | alive |
| F | 19 | Immature teratoma | sacroccocygeal      | no | no  | no | yes | no           | alive |
| F | 18 | Immature teratoma | head/neck<br>region | no | yes | no | yes | no           | alive |
| F | 10 | Immature teratoma | abdomen             | no | no  | no | yes | Yes, abdomen | alive |
| F | 25 | Yolk sac tumor    | sacroccocygeal      | no | no  | no | yes | no           | alive |
| F | 11 | Mature teratoma   | sacroccocygeal      | no | yes | no | yes | no           | alive |

|   |    |                 |                     |                       |     |    |     |    |       |
|---|----|-----------------|---------------------|-----------------------|-----|----|-----|----|-------|
| F | 18 | Yolk sac tumor  | sacroccocygeal      | no                    | yes | no | yes | no | alive |
| F | 27 | Mature teratoma | head/neck<br>region | no                    | no  | no | yes | no | alive |
| F | 17 | Mature teratoma | sacroccocygeal      | no                    | no  | no | yes | no | alive |
| M | 15 | Mature teratoma | sacroccocygeal      | no                    | no  | no | yes | no | alive |
| F | 13 | Mature teratoma | sacroccocygeal      | no                    | no  | no | yes | no | alive |
| F | 14 | Mature teratoma | sacroccocygeal      | no                    | no  | no | yes | no | alive |
| M | 15 | Mature teratoma | sacroccocygeal      | no                    | yes | no | yes | no | alive |
| M | 10 | Yolk sac tumor  | sacroccocygeal      | no                    | no  | no | yes | no | alive |
| M | 13 | Yolk sac tumor  | head/neck<br>region | Yes,<br>lymph<br>node | yes | no | yes | no | alive |

**Table S2.** Clinical characteristics of newborns affected by neuroblastoma are summarized. SCA = segmental chromosomal alterations. NA = not applicable. TRM = treatment related mortality

| Sex | Age at Diagnosis (Days) | Stage | Genomic Risk Factors | Localization  | Metastasis Site                            | Prenatal Diagnosis | Chemotherapy | Surgery | Relapse | Outcome | Death Causes |
|-----|-------------------------|-------|----------------------|---------------|--------------------------------------------|--------------------|--------------|---------|---------|---------|--------------|
| F   | 11                      | Ms    | NA                   | adrenal       | bone                                       | no                 | no           | yes     | no      | alive   | NA           |
| F   | 13                      | L1    | NA                   | adrenal       | NA                                         | no                 | yes          | yes     | no      | alive   | NA           |
| F   | 3                       | Ms    | NA                   | adrenal       | liver                                      | no                 | no           | no      | no      | alive   | NA           |
| F   | 6                       | Ms    | NA                   | paravertebral | liver                                      | no                 | yes          | no      | yes     | alive   | NA           |
| M   | 17                      | L1    | NA                   | adrenal       | NA                                         | yes                | no           | yes     | no      | alive   | NA           |
| M   | 22                      | Ms    | SCA                  | adrenal       | bone, bone marrow, liver, skin, paraspinal | no                 | yes          | yes     | no      | alive   | NA           |
| M   | 1                       | Ms    | SCA                  | pelvic        | liver                                      | no                 | no           | no      | no      | alive   | NA           |
| M   | 17                      | L1    | NA                   | adrenal       | NA                                         | no                 | no           | yes     | no      | alive   | NA           |
| M   | 1                       | L2    | NA                   | adrenal       | liver                                      | no                 | yes          | no      | no      | died    | TRM          |

|          |    |    |                               |         |       |    |     |     |    |       |    |
|----------|----|----|-------------------------------|---------|-------|----|-----|-----|----|-------|----|
| <b>M</b> | 17 | L2 | NA                            | pelvic  | NA    | no | yes | no  | no | alive | NA |
| <b>M</b> | 23 | L1 | NA                            | adrenal | NA    | no | no  | yes | no | alive | NA |
| <b>F</b> | 18 | Ms | <i>MYC-N</i><br>amplification | adrenal | liver | no | yes | no  | no | alive | NA |

**Table S3.** Clinical characteristics of newborns affected by soft tissue sarcoma are summarized. NA = not applicable. PD = progressive disease. TRM = treatment related mortality.

| Sex | Age at diagnosis (days) | Diagnosis                  | Genomic alterations                | Localization    | Metastasis                                   | Prenatal diagnosis | Chemo-therapy | Surgery | Relapse | Outcome | Death cause |
|-----|-------------------------|----------------------------|------------------------------------|-----------------|----------------------------------------------|--------------------|---------------|---------|---------|---------|-------------|
| F   | 25                      | Congenital Fibrosarcoma    | NA                                 | retroperitoneal | no                                           | yes                | yes           | yes     | no      | alive   | NA          |
| M   | 26                      | Embryonal Rhabdomyosarcoma | NA                                 | bladder         | no                                           | no                 | yes           | yes     | no      | alive   | NA          |
| F   | 15                      | Alveolar Rhabdomyosarcoma  | t(2;13) (q35;q14) <i>PAX3/FKHR</i> | head/neck       | Yes, liver, pancreas, lung, bone marrow, CNS | no                 | yes           | yes     | no      | died    | PD          |
| F   | 22                      | Myofibroma                 | NA                                 | forearm         | no                                           | no                 | no            | yes     | no      | alive   | NA          |
| F   | 3                       | Malignant rhabdoid tumor   | <i>SMARCA</i> neg                  | head/neck       | no                                           | no                 | no            | no      | no      | died    | TRM         |

**Table S4.** Clinical characteristics of newborns with retinoblastoma are summarized. SCA = segmental chromosomal alterations.

| Sex | Age at<br>Diagnosis<br>(Days) | Familial<br>History | Localization | Metastasis | Prenatal<br>Diagnosis | Chemotherapy | Surgery | Relapse | Outcome | <i>RB1</i> Germ<br>Line<br>Mutation |
|-----|-------------------------------|---------------------|--------------|------------|-----------------------|--------------|---------|---------|---------|-------------------------------------|
| M   | 11                            | yes                 | unilateral   | no         | no                    | yes          | no      | no      | alive   | yes                                 |
| M   | 20                            | yes                 | bilateral    | no         | no                    | yes          | no      | no      | alive   | yes                                 |
| M   | 0                             | yes                 | unilateral   | no         | no                    | yes          | no      | no      | alive   | yes                                 |
| F   | 15                            | no                  | unilateral   | no         | no                    | yes          | no      | no      | alive   | no                                  |

**Table S5.** Clinical characteristics of newborns affected by CNS tumors are summarized. NA = not applicable. TRM = treatment related mortality.

| Sex | Age at<br>Diagnosis<br>(Days) | Diagnosis                | Metastasis | Prenatal<br>Diagnosis | Chemotherapy | Surgery | Recurrence | Outcome | Death<br>Cause |
|-----|-------------------------------|--------------------------|------------|-----------------------|--------------|---------|------------|---------|----------------|
| F   | 1                             | Ganglioglioma            | no         | no                    | no           | yes     | no         | alive   | NA             |
| F   | 5                             | Glioblastoma             | no         | yes                   | yes          | yes     | no         | alive   | NA             |
| M   | 0                             | Choroid plexus carcinoma | no         | yes                   | yes          | yes     | no         | alive   | NA             |
| F   | 0                             | Mature teratoma          | no         | yes                   | no           | no      | no         | died    | TRM            |

**Table S6.** Clinical characteristics of newborns affected by other malignancies are summarized. NA = not applicable. TRM = treatment related mortality.

| Sex | Age at<br>Diagnosis<br>(Days) | Disease                         | Localization  | Metastasis | Prenatal<br>Diagnosis | Chemotherapy | Surgery | Relapse | Outcome | Death<br>Cause |
|-----|-------------------------------|---------------------------------|---------------|------------|-----------------------|--------------|---------|---------|---------|----------------|
| F   | 2                             | Mesoblastic nephroma, cellular  | Kidney        | no         | no                    | no           | yes     | no      | alive   | NA             |
| M   | 6                             | Plexiform neurofibroma          | Head/neck     | no         | no                    | yes          | no      | no      | alive   | NA             |
| F   | 13                            | Acute lymphoblastic leukemia, B | Bone marrow   | no         | no                    | yes          | no      | no      | alive   | NA             |
| M   | 3                             | Akute myeloblastic leukemia     | Bone marrow   | no         | no                    | yes          | no      | no      | died    | TRM            |
| F   | 1                             | Adrenal cortical carcinoma      | Adrenal gland | no         | yes                   | no           | yes     | no      | alive   | NA             |
| F   | 9                             | Mesoblastic nephroma, classic   | Kidney        | no         | no                    | no           | yes     | no      | alive   | NA             |
| F   | 1                             | Akute myeloblastic leukemia     | Bone marrow   | no         | no                    | yes          | no      | no      | alive   | NA             |
| M   | 26                            | Langerhans cell histiocytosis   | Skin of trunk | no         | no                    | no           | no      | no      | alive   | NA             |
| M   | 20                            | Langerhans cell histiocytosis   | Skin of trunk | no         | no                    | yes          | no      | no      | alive   | NA             |
